# Role of a $G\alpha_{i2}$ protein splice variant in the formation of an intracellular dopamine $D_2$ receptor pool

Manuel F. López-Aranda<sup>1,\*</sup>, Maria J. Acevedo<sup>1,\*</sup>, Antonia Gutierrez<sup>2</sup>, Peter Koulen<sup>3</sup> and Zafar U. Khan<sup>1,‡</sup>

<sup>1</sup>Neurobiology Laboratory, CIMES, Faculty of Medicine and <sup>2</sup>Department of Cell Biology, Faculty of Science, University of Malaga, Campus Teatinos s/n, 29071-Malaga, Spain

<sup>3</sup>Department of Pharmacology and Neuroscience, University of North Texas Health Science Center, Fort Worth, TX 76107, USA

\*These authors contributed equally to this work

‡Author for correspondence (e-mail: zkhan@uma.es)

Accepted 1 May 2007

Journal of Cell Science 120, 2171-2178 Published by The Company of Biologists 2007  
doi:10.1242/jcs.005611

## Summary

Treatment of  $D_2$ -receptor-expressing cells with specific drugs upregulates the receptor number at the cell surface independently of protein synthesis, leading to the concept of an intracellular receptor pool. However, how this pool is operating is still an enigma. Here, we report that a splice variant of the  $G\alpha_{i2}$  protein, protein  $sG\alpha_{i2}$ , plays a crucial role in the maintenance of this  $D_2$ -receptor pool. Co-expression of  $sG_{i2}$  with  $D_2$  receptor reduced receptor localization to cell surface by one-third. This effect is associated with specific intracellular protein-protein interaction and the formation of a  $sG_{i2}$ - $D_2$ -receptor complex. It has been suggested that the formation of this complex serves to prevent  $D_2$  receptors from reaching the cell membrane. Treatment of  $D_2$ -receptor-expressing cells

with agonists increased the number of cell surface  $D_2$  receptors and coincided with a reduction in these receptors from intracellular complexes, suggesting that agonist treatment released  $D_2$  receptors from the complex allowing them to localize to the cell membrane. Thus, in addition to elucidating how the intracellular pool of  $D_2$  receptor functions, our findings uncover a novel mechanism regulating the density of cell surface  $D_2$  receptors.

Supplementary material available online at  
<http://jcs.biologists.org/cgi/content/full/120/13/2171/DC1>

Key words: Protein-protein interaction, Intracellular receptor pool,  $D_2$  receptor,  $G\alpha_{i2}$  protein, Receptor upregulation, Receptor density

## Introduction

Drug-induced augmentation of  $D_2$  receptor on plasma membrane has been reported in a cell line that expresses endogenous  $D_2$  receptors (Ivins et al., 1991), as well as in HEK-293 cells (Boundy et al., 1995; Filtz et al., 1993), CHO cells (Itokawa et al., 1996; Zhang et al., 1994),  $C_6$  glioma cells and  $Ltk^-$  cells (Starr et al., 1995), and Sf9 cells (Ng et al., 1997) when expressing recombinant  $D_2$  receptors. This upregulation was not affected by the inhibition of protein synthesis (Filtz et al., 1993; Starr et al., 1995; Ng et al., 1997) and, therefore, it was proposed that this increase of receptors was owing to their recruitment from existing intracellular reservoir(s) (Ng et al., 1997). Increase in receptor numbers following drug treatments has also been observed in other transmitter-receptor systems (Creese and Sibley, 1981). The most recent work describing agonist exposure of cells that express  $D_2$  receptors found translocation of receptor from cytoplasm to plasma membrane (Ng et al., 1997), providing direct evidence of functional receptor pool in the cytoplasm. It is well known that the interaction of plasma-membrane-bound dopamine  $D_2$  receptor with  $G\alpha_{i2}$  protein is fundamental for signal transmission. However, we and others have shown previously that, in contrast to  $G\alpha_{i2}$  protein – which is localized at the cell surface,  $sG_{i2}$  is an intracellular protein and not found at plasma membrane (Khan and Gutierrez, 2004; Montmayeur and Borrelli, 1994). A Proline-rich motif at the C-terminus is thought to be crucial for the intracellular translocation of this protein (Picetti and

Borrelli, 2000). The  $sG_{i2}$  transcript encodes a protein with a different C-terminus, in which a 24-amino acid (aa) stretch is replaced by a 35-aa sequence. Like  $sG_{i2}$ , other G-proteins have also been identified on intracellular membranes (Audigier et al., 1988; Weiss et al., 2001), where they participate in different functions, such as protein transport (Bomsel and Mostov, 1992; Erkolani et al., 1990; Helms, 1995; Pimplikar and Simons, 1993). On the basis of the interaction between non-spliced  $G\alpha_{i2}$  protein and dopamine  $D_2$  receptor (Gazi et al., 2003; Senogles, 1994), and the localization of  $sG_{i2}$  protein in brain dopaminergic cells (Khan and Gutierrez, 2004) where prominent expression of  $D_2$  receptors was also found (Khan et al., 1998a), we hypothesized that the  $sG_{i2}$  protein takes part in the translocation of dopamine  $D_2$  receptors to cell surface. To our surprise,  $sG_{i2}$  protein not only regulated the density of  $D_2$  receptor at cell surface but also participated in the formation of an intracellular reservoir of this receptor.

## Results

In intact BHK cells, co-expression of the long isoform of the  $D_2$  receptor ( $D_{2L}$ ) and the  $sG_{i2}$  protein led to a 31% decrease in the number ( $B_{max}$ ) of plasma-membrane-bound receptor ( $5.25 \pm 0.41$  fmol per  $10^6$  cells of  $D_{2L}$  alone versus  $3.65 \pm 0.35$  fmol per  $10^6$  cells of  $D_{2L}$  with  $sG_{i2}$ ). This loss in  $D_{2L}$  receptor was dependent on the amount of  $sG_{i2}$  protein co-expression (Fig. 1A). As the level of expression of  $sG_{i2}$  increased, more reduction in  $B_{max}$  of  $D_{2L}$  receptor was observed. However, no

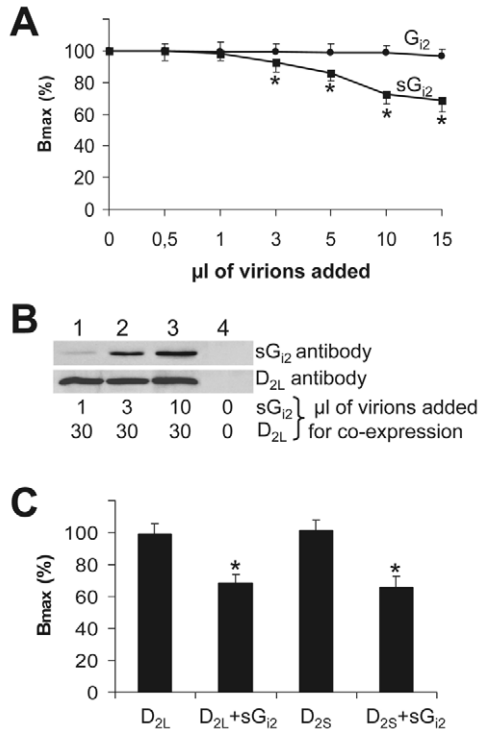

**Fig. 1.** Expression of sG<sub>12</sub> reduces the dopamine D<sub>2</sub> receptor density at the plasma membrane. (A) Infection of BHK cells with 30 µl pseudovirions of D<sub>2L</sub> (long isoform of D<sub>2</sub> receptor) and 0–15 µl of sG<sub>12</sub> (●) or Gα<sub>12</sub> (G<sub>12</sub>, ■) protein showed a gradual decrease in the number of plasma-membrane-bound D<sub>2</sub> receptors as the expression of sG<sub>12</sub> protein was increased. G<sub>12</sub> had no effect. (B) Immunoblots of cells from A show that, as the addition of sG<sub>12</sub> pseudovirion was increased, higher expression of this protein. D<sub>2L</sub> expression remained the same. Non-transfected cells are shown in lane 4. (C) In JEG-3 cells that lack endogenous G<sub>12</sub> protein, co-expression of sG<sub>12</sub> with either D<sub>2L</sub> or D<sub>2S</sub> (short isoform of D<sub>2</sub> receptor) receptors also yielded a 32–35% reduction in cell surface D<sub>2</sub> receptors, similar to that as seen in BHK cells in A. \**P*<0.05, significant change from control. Values are representative of six to eight different experiments.

further reduction was observed at 30 µl of pseudovirions (not shown). The substitution of sG<sub>12</sub> with Gα<sub>12</sub> had no effect (Fig. 1A). This finding suggests that the receptor loss seen is specifically associated to sG<sub>12</sub> protein. To exclude the possibility that sG<sub>12</sub> inhibits protein expression, we checked the expression levels of both D<sub>2L</sub> and sG<sub>12</sub> proteins in these experiments by immunoblotting, by using affinity-purified antibodies [for data on specificity tests for D<sub>2L</sub> and D<sub>2S</sub> antibodies see Khan et al. (Khan et al., 1998a) and for sG<sub>12</sub> antibodies see supplementary material Fig. S1]. In fact, we found that the D<sub>2L</sub> receptor concentration was unchanged, whereas expression of sG<sub>12</sub> protein was increased as expected (Fig. 1B), indicating that reduction of D<sub>2L</sub> was not due to lower expression of this receptor. Next, we analyzed the binding affinity (*K*<sub>d</sub>) of D<sub>2</sub> receptor that might have been compromised during co-expression of both proteins, but no discernable change was observed (*K*<sub>d</sub>=80±15 pM without sG<sub>12</sub> and 73±16 pM with sG<sub>12</sub>). A similar effect of sG<sub>12</sub> protein on D<sub>2L</sub> as well

as D<sub>2S</sub> receptors was also observed in other cell lines, including JEG-3 (Fig. 1C) and NG108-15 (Fig. 3B). These results not only confirm the observations made in BHK cells but also implicate that the regulation of the density of cell surface D<sub>2S</sub> and D<sub>2L</sub> receptors by sG<sub>12</sub> protein is a common characteristic among various cell types. The use of human carcinoma JEG-3 cells that lack D<sub>2</sub> receptor and Gα<sub>12</sub> (Guiramand et al., 1995) also showed effects similar to other cell lines. It was observed that co-expression of either D<sub>2L</sub> or D<sub>2S</sub> receptors with sG<sub>12</sub> protein produced a loss of 32% or 35%, respectively (Fig. 1C). Furthermore, evidence from immunoblot analysis (Fig. 1B) suggests that, even though the total expression of D<sub>2L</sub> receptors (cell-surface-bound plus intracellular) was unchanged, localization of D<sub>2L</sub> receptor on the cell surface was reduced. Therefore, we further examined the localization of D<sub>2</sub> receptors in these cells by double immunofluorescence labeling (Fig. 2) and found that, when D<sub>2S</sub> or D<sub>2L</sub> receptors were expressed alone, they mainly localized at plasma membrane (Fig. 2A), co-expression with sG<sub>12</sub>, membrane localization of the receptor was noticeably reduced. This reduction in cell surface localization was probably due to accumulation of D<sub>2S</sub>-sG<sub>12</sub> protein complex seen in the intracellular membranes (Fig. 2B,C,D).

To further demonstrate that the loss of D<sub>2</sub> receptor activity in intact cells was due to a reduction in functional cell surface receptor population, we performed in-vivo Ca<sup>2+</sup>-transient studies in these cells by Ca<sup>2+</sup> imaging. It is known that antagonist-mediated blockade of D<sub>2</sub> receptor augments intracellular Ca<sup>2+</sup> flow via membrane-bound voltage-gated Ca<sup>2+</sup> channels (Chronwall et al., 1995; Pauwels et al., 2001). Therefore, we used this paradigm expecting that a decrease in the cell-surface-associated D<sub>2</sub> receptor after co-expression of sG<sub>12</sub> proportionally reduces the D<sub>2</sub>-antagonist-mediated Ca<sup>2+</sup> rise. Because of downstream D<sub>2</sub>-signaling pathways, NG108-15 – a neuroblastoma/glioma cell line of neural origin (Pilon et al., 1994) – was also included in this study. Indeed, application of 15 µM raclopride, a D<sub>2</sub> receptor antagonist, produced a transient increase in the intracellular Ca<sup>2+</sup> concentration, which was significantly reduced (30–35%) in cells that co-expressed sG<sub>12</sub>, similar to the observation made in ligand-binding experiments (D<sub>2L</sub> 2.1±0.1 versus D<sub>2L</sub>+sG<sub>12</sub> 1.53±0.1 and D<sub>2S</sub> 2.2±0.2 versus D<sub>2S</sub>+sG<sub>12</sub> 1.44±0.1; values are F/F<sub>0</sub> ratios of Ca<sup>2+</sup> changes after drug application from the baseline) (Fig. 3A–C). In control experiments, the use of neither Gα<sub>12</sub> protein in place of sG<sub>12</sub> nor D<sub>1</sub> in place of D<sub>2S</sub> or D<sub>2L</sub> receptor produced any such effect (Fig. 3C). In contrast to antagonist, D<sub>2</sub> receptor activation by agonist reduces Ca<sup>2+</sup> flow (Lledo et al., 1990; Wolfe and Morris, 1999). Consistent with this, agonist treatment led to a decrease in Ca<sup>2+</sup> levels in cells expressing D<sub>2</sub> receptor; however, co-expression of sG<sub>12</sub> reduced this decrease (see supplementary material Fig. S2). These results suggest that a reduced efficiency of Ca<sup>2+</sup> flow is associated with a lower number of D<sub>2</sub> receptors at the plasma membrane. To rule out the participation of intracellular Ca<sup>2+</sup> stores in our experiments, we used 2-aminoethoxydiphenyl borate (APB), an inhibitor of the IP<sub>3</sub> receptor. Treatment of cells with APB did not influence the Ca<sup>2+</sup> transients, whereas the thapsigargin-stimulated Ca<sup>2+</sup> release from intracellular stores could still be observed. This observation suggested that intracellular Ca<sup>2+</sup> stores were intact but did not participate in D<sub>2</sub>-modulated Ca<sup>2+</sup> increase. In addition, the use of Ca<sup>2+</sup>-free

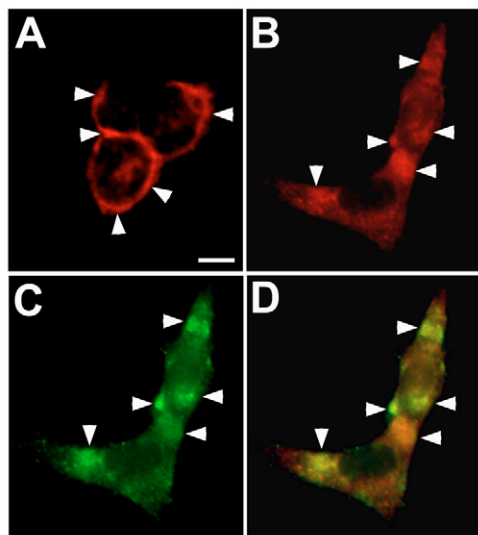

**Fig. 2.** (A-D) Co-accumulation of D<sub>2</sub> receptor and sG<sub>12</sub> protein complex in cytoplasmic space. (A) D<sub>2S</sub> receptors were expressed alone in BHK cells and immunodetected by antibodies to D<sub>2S</sub> receptor. In these cells, most of the D<sub>2S</sub> proteins were localized at the cell surface (arrowheads). However, when D<sub>2S</sub> receptors were co-expressed with sG<sub>12</sub> proteins (B and C) in these cells, cell surface localization of receptors was reduced markedly (arrowheads indicate protein immunolabeling). They co-accumulated in cytoplasm space with sG<sub>12</sub> protein (arrowheads in D). To detect the co-labeling of both proteins, specific antibodies against D<sub>2S</sub> (B) and sG<sub>12</sub> (C) were used in double labeling immunofluorescence experiment. Bar, 12  $\mu$ m.

medium or medium containing EGTA and CoCl<sub>2</sub> (blockers of membrane Ca<sup>2+</sup> channels) and APB yielded the same results, further supporting this notion (see supplementary material Fig. S3).

Direct evidence of interaction between D<sub>2</sub> receptor and sG<sub>12</sub> protein came from the co-elution of a D<sub>2</sub>-sG<sub>12</sub> complex using affinity-columns (Fig. 4A). The columns were prepared with affinity-purified specific antibodies against D<sub>2L</sub>, D<sub>2S</sub> (Khan et al., 1998a; Khan et al., 2001) or sG<sub>12</sub> protein (see supplementary material Fig. S1 for evidence on antibody specificity). Both affinity-columns that were immobilized with antibodies against D<sub>2L</sub> and D<sub>2S</sub> co-eluted sG<sub>12</sub> protein (Fig. 4A). Using the sG<sub>12</sub> antibody affinity-column, we observed co-elution of D<sub>2S</sub> and D<sub>2L</sub> receptors but not of D<sub>1</sub> receptor (Fig. 4A). To further demonstrate the functional interaction between sG<sub>12</sub> protein and active D<sub>2</sub> receptors, solubilized proteins from cells were incubated with antiserum against sG<sub>12</sub> and presence of co-immunoprecipitated D<sub>2</sub> receptor was determined. We observed 24.6 $\pm$ 4.9% co-precipitation of D<sub>2</sub> receptor with sG<sub>12</sub> antibodies (Fig. 4B). The fact that sG<sub>12</sub> antibody did not bind D<sub>1</sub> receptor suggests again that the D<sub>2</sub>-sG<sub>12</sub> interaction is specific.

To find out whether the complex of D<sub>2</sub>-sG<sub>12</sub> also exists in brain tissues, we used extracts from substantia nigra, a region where most neurons express high number of dopamine D<sub>2S</sub>

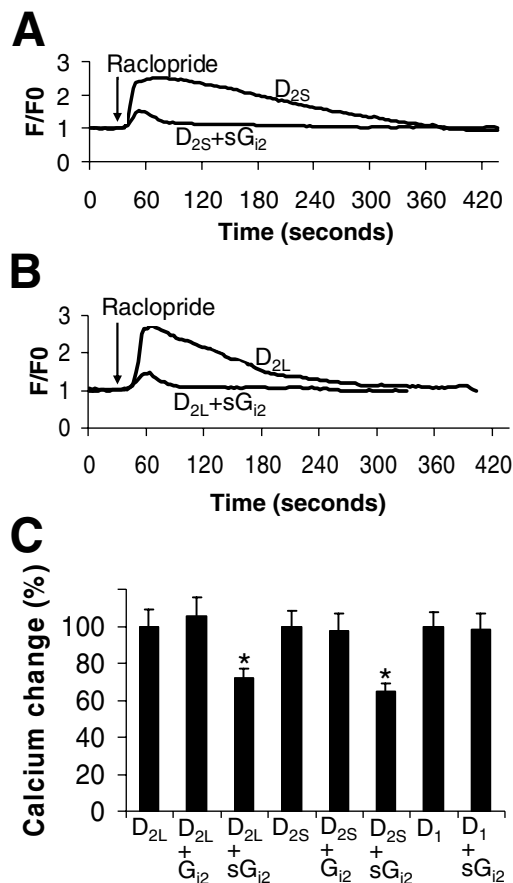

**Fig. 3.** Reduced D<sub>2</sub> receptor-mediated plasma membrane Ca<sup>2+</sup> channel activity after co-expression with sG<sub>12</sub> demonstrates the reduced D<sub>2</sub> receptor density at cell surface. (A,B) Typical intracellular Ca<sup>2+</sup> transient in a single BHK cell expressing (A) D<sub>2S</sub> and (B) D<sub>2L</sub> receptor, after application of 15  $\mu$ M raclopride, a D<sub>2</sub> antagonist. This activity was significantly reduced in cells when sG<sub>12</sub> was co-expressed. (C) Summary of the results from experiments using NG108-15 cells. Co-expression of sG<sub>12</sub> with either D<sub>2L</sub> or D<sub>2S</sub> produced a 30-35% decrease in Ca<sup>2+</sup> transients, similar to receptor binding results shown in Fig. 1. This activity was associated with D<sub>2</sub> and not to D<sub>1</sub> receptors. In addition, expression of G<sub>12</sub> instead of sG<sub>12</sub> did not show any change. F/F<sub>0</sub> represents the change in fluorescence intensity over baseline (see Materials and Methods). \**P*<0.05, significant change from control. Values are representative of six different experiments.

receptors (Khan et al., 1998a) and where we have also observed a strong immunolabeling of sG<sub>12</sub> protein (Khan and Gutierrez, 2004). Immunoaffinity co-elution experiments similar to those described above confirmed the existence of a D<sub>2S</sub>-sG<sub>12</sub> protein complex in this tissue (Fig. 5).

Furthermore, we performed deletion experiments with cDNA of sG<sub>12</sub> to dissect the site involved in their intracellular interaction. As indicated in Fig. 6A, deletion constructs of sG<sub>12</sub> were co-expressed with D<sub>2S</sub> receptor in BHK cells and D<sub>2</sub> receptor density at cell surface was determined by whole-cell binding assays. Truncated protein constructs lacking 108 bp of the extreme 3'-terminal end (sG<sub>12</sub>-N1, sG<sub>12</sub>-N2 and sG<sub>12</sub>-C2) lost the capability to interact (Fig. 6B); in contrast to sG<sub>12</sub> and its deletion construct (sG<sub>12</sub>-C1) that both contain this extreme

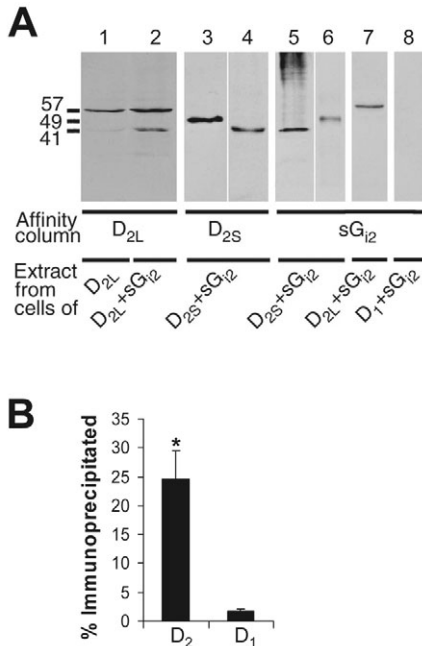

**Fig. 4.** Co-immunoelution of sG<sub>i2</sub> protein with D<sub>2S</sub> and D<sub>2L</sub> receptors. (A) BHK cell extracts were passed through immunoaffinity columns and resultant proteins were identified on immunoblots with a mixture of antibodies against D<sub>2L</sub> and sG<sub>i2</sub> (lanes 1, 2) and antibodies to D<sub>2S</sub> (lanes 3, 6), sG<sub>i2</sub> (lanes 4, 5), D<sub>2L</sub> (lane 7) and D<sub>1</sub> (lane 8). sG<sub>i2</sub> protein (41 kDa) co-eluted with both D<sub>2L</sub> (57 kDa) and D<sub>2S</sub> (49 kDa) antibodies and vice-versa. D<sub>1</sub> receptor was not co-eluted with sG<sub>i2</sub>. (B) sG<sub>i2</sub> antibodies co-immunoprecipitated D<sub>2</sub> (<sup>3</sup>H-raclopride) but not D<sub>1</sub> (<sup>3</sup>H-SCH 23390) receptor binding sites from extracts of BHK cells expressing sG<sub>i2</sub> and D<sub>2S</sub> or D<sub>1</sub>. Values are representative of four different experiments.

3'-terminal, which retained this activity. These results suggest that the 36 amino acids C-terminal of sG<sub>i2</sub> are essential for the binding with D<sub>2</sub> receptor and necessary to invoke the effect of complex formation.

To further test the effect of D<sub>2</sub> drugs on cell surface receptor density, we treated cells that expressed both D<sub>2S</sub> and sG<sub>i2</sub> protein with D<sub>2</sub>-agonists for 30 minutes. Exposure with 10 μM of dopamine or 5 μM quinpirole led to an increase in the density of cell-surface-bound D<sub>2S</sub> receptors (Fig. 7A). These results are in agreement with earlier reports, in which an increase in the cell-surface-bound D<sub>2</sub> receptor was observed after exposure to dopamine D<sub>2</sub> drugs (Filtz et al., 1993; Starr et al., 1995; Ng et al., 1997). Treatment of the same cells with 5 μM raclopride, a D<sub>2</sub> antagonist, had no effect (Fig. 7A). Next, we used the cells from the experiment described in Fig. 7A to isolate the sG<sub>i2</sub>-D<sub>2</sub> complex with sG<sub>i2</sub>-immunoaffinity columns and to determine the concentration of D<sub>2S</sub> receptor bound to sG<sub>i2</sub>. The combination of immunoblots and optical-density measurements showed that dopamine and quinpirole treatment reduced the amount of D<sub>2</sub> bound to sG<sub>i2</sub>, whereas levels of D<sub>2</sub> in both raclopride-treated and untreated control cells was unchanged (Fig. 7B,C). The levels of sG<sub>i2</sub> under these conditions were unchanged (Fig. 7B). Our findings suggest that D<sub>2</sub>-agonist-mediated activity has freed D<sub>2</sub> receptors from sG<sub>i2</sub>-

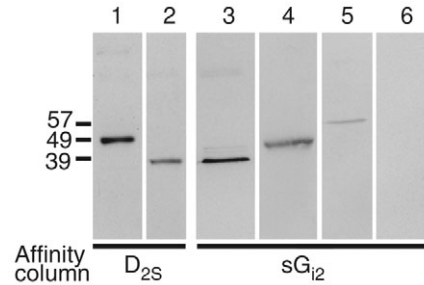

**Fig. 5.** Co-immunoelution of sG<sub>i2</sub> protein with D<sub>2S</sub> and D<sub>2L</sub> receptor from the extract of monkey brain. Similar to Fig. 4, extract from the substantia nigra was passed through immunoaffinity columns as indicated. Eluted proteins were then identified in immunoblots with antibodies raised against D<sub>2S</sub> (lanes 1, 4), sG<sub>i2</sub> (lanes 2, 3), D<sub>2L</sub> (lane 5), D<sub>1</sub> (lane 6). sG<sub>i2</sub> antibody co-eluted D<sub>2S</sub> and D<sub>2L</sub> receptors but not D<sub>1</sub> receptor.

containing intracellular complexes, and that these D<sub>2</sub> receptors then localized to the plasma membrane. Values obtained in the experiments using D<sub>2L</sub> or D<sub>2S</sub> were not significantly different from each other.

## Discussion

Here, we have presented evidence that the sG<sub>i2</sub> protein participates in the formation of an intracellular D<sub>2</sub> receptor pool by specific protein-protein interaction and in the regulation of the density of these receptors at the cell membrane. To our knowledge, this constitutes the first description of how the D<sub>2</sub> receptor pool system functions within the cell. Our results of intracellular D<sub>2S</sub>- and D<sub>2L</sub>-receptor sequestration by sG<sub>i2</sub> protein, and their translocation to cell surface after D<sub>2</sub>-agonist treatment explain how an increase in numbers of D<sub>2</sub> receptor is possible while protein synthesis is blocked. An increase in the number of D<sub>2L</sub> receptors on the cell surface and a proportional decrease in the number of the same receptors in the cytoplasm were observed when D<sub>2L</sub>-expressing cells were exposed to agonist (Ng et al., 1997). In rats treated with haloperidol, dopamine challenge led to upregulation of the dopamine D<sub>2</sub> receptor (Creese et al., 1976; Severson et al., 1984). However, the prevalence of steady-state D<sub>2</sub> receptor RNA was unaffected (Goss et al., 1991). It was therefore, suggested that an intracellular D<sub>2</sub> receptor pool is needed to upregulate D<sub>2</sub> during dopamine challenge. It is likely that this pool supplies receptor to plasma membrane in conditions such as those described by 'the law of denervation' and when normal protein synthesis is not capable to fulfill the requirement. Furthermore, the maintenance of the D<sub>2</sub> receptor reservoir while protein synthesis is active (Starr et al., 1995), suggests that the machinery synthesizing dopamine D<sub>2</sub> receptor is not a substitute for the D<sub>2</sub> receptor pool. However, it remains to be explored whether, after synthesis, dopamine D<sub>2</sub> receptors are first localized to the intracellular reservoir before being translocated to the cell surface, or whether they are transported directly to the plasma membrane when the reservoir is saturated. It is also reasonable to argue that this sG<sub>i2</sub>-driven reservoir might not only function as a stock room for D<sub>2</sub> receptor but might also control the amount of D<sub>2</sub>-mediated signal to be transmitted inside the cell by regulating the cell surface density of this receptor.



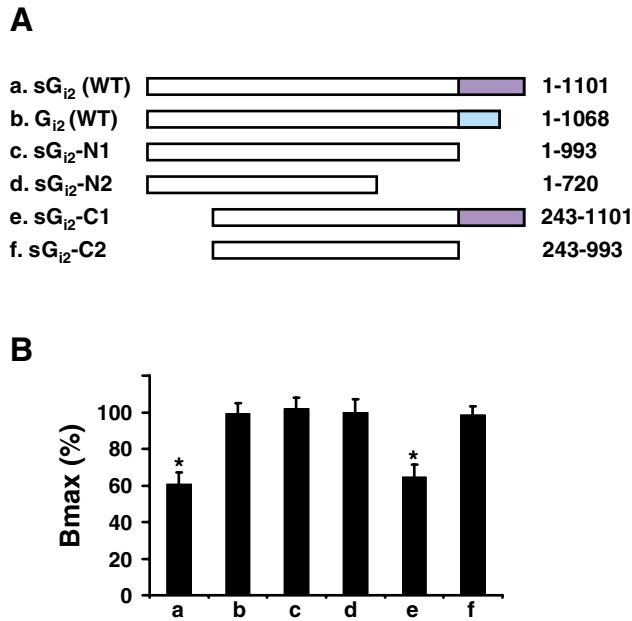

**Fig. 6.** The extreme C-terminal end of sG<sub>12</sub> is essential for the intracellular interaction. (A) For deletion experiments, sG<sub>12</sub> constructs were prepared by eliminating the part of the complete cDNA sequence with the use of specific PCR primers and then cloned. Each bar reflects the approximate size and location of each construct included in the study. Numbers on the right indicate start and end of the cDNA sequence. sG<sub>12</sub> (WT) and G<sub>α12</sub> (WT) are complete genes and rest (c-f) are the constructs derived from sG<sub>12</sub> (WT). Shaded areas show the sequences that differ between sG<sub>12</sub> and G<sub>α12</sub>. G<sub>α12</sub> was included in the study as control. (B) Each of the constructs or WT (a-f) from (A) was co-expressed with D<sub>25</sub> receptor in BHK cells and the receptor density at cell surface was assayed in intact cells. The protein expression of these constructs was confirmed by western blots (see supplementary material Fig. S5). The 108 base pairs on the extreme 3'-end were necessary for the intracellular interaction and retention of the receptor. Values are representative of five different experiments.

The presence of sG<sub>12</sub>-D<sub>2</sub> receptor complex in brain tissues suggests their physiological importance in brain function. Apart from expression in neuronal intracellular compartments (Khan and Gutierrez, 2004), sG<sub>12</sub> proteins were also found in abundance in axons and spines, where the most notable observation was its frequent localization to or near to the neck of spines (70% of 41 labeled spines observed) (see supplementary material Fig. S4). In addition, these proteins are often localized not at, but in close proximity to, the synapse. Given the binding capability of sG<sub>12</sub> with D<sub>2</sub> receptor, this strategic extra-synaptic presence of sG<sub>12</sub> proteins suggests that these proteins bind D<sub>2</sub> receptors and prevent their localization at the synapse and, as a result, this binding can interrupt the full participation of D<sub>2</sub> receptors in synaptic neurotransmission events. Therefore, this mechanism might fine-tune the D<sub>2</sub>-mediated synaptic transmission, depending on the requirement of local circuits. Although we have confirmed the non-binding to other dopamine, glycine and GABA<sub>A</sub> receptors, it remains to be determined whether sG<sub>12</sub> protein binds to other receptors and synaptic proteins to participate in similar processes.

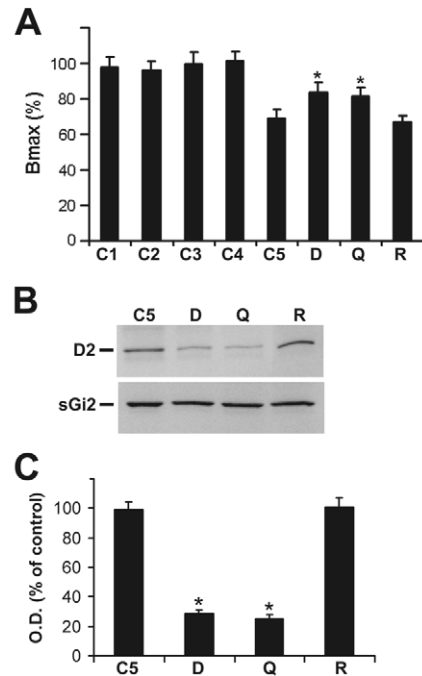

**Fig. 7.** Treatment with dopamine agonists increases the D<sub>2</sub> receptor density at plasma membrane and decreases the D<sub>2</sub> level from sG<sub>12</sub>-D<sub>2</sub> complex. (A) Incubation of BHK cells expressing D<sub>25</sub> and sG<sub>12</sub> protein with 10 μM dopamine (D) or 5 μM quinpirole (Q) for 30 minutes showed a significant increase (18%) in D<sub>2</sub> receptor localization at plasma membrane. By contrast, however, treatment with antagonist [raclopride (R), 5 μM] produced no effect. Controls are from C1 to C5 (C1, cells expressing D<sub>25</sub> receptors alone and treated with dopamine; C2, cells treated with quinpirole; C3, cells expressing G<sub>α12</sub> as well as D<sub>25</sub> receptor and treated with dopamine; C4, cells treated with quinpirole; C5, cells expressing sG<sub>12</sub> and D<sub>25</sub> receptor but left untreated). (B) Extracts of same cells as used in A were passed through sG<sub>12</sub> immunoaffinity columns and eluted to determine sG<sub>12</sub>-bound D<sub>25</sub> receptor in above conditions. Immunoblot assays show that agonist treatment resulted in loss of ~75% (equals to 22% of the binding results) D<sub>25</sub> component (49 kDa) from sG<sub>12</sub>-D<sub>25</sub> complex, whereas the level of sG<sub>12</sub> was the same in all conditions. (C) Average OD change in immunoblot experiments from B. Results show that only 28.6±2.48% and 25±2.78% of the D<sub>25</sub> receptor remained bound in the sG<sub>12</sub>-protein complex eluted from dopamine (D)-treated and quinpirole (Q)-treated cells, respectively. Values are representative of five different experiments.

The C-terminal of the G<sub>α12</sub> protein is known to interact with the dopamine D<sub>2</sub> receptor in order to transmit signals at the plasma membrane (Boundy et al., 1993; Damaj et al., 1996; Senogles et al., 2004); the third cytoplasmic loop of dopamine D<sub>2</sub> receptor was found to be crucial for this G<sub>i</sub> protein interaction (Malek et al., 1993). Though, in sG<sub>12</sub>, this terminal end is replaced, our results using deletion constructs demonstrate that 36 amino acids of the C-terminal end are essential for the intracellular interaction with the D<sub>2</sub> receptor. In contrast to sG<sub>12</sub>, proteins that interact with the third intracellular loop of the dopamine D<sub>2</sub> receptor, such as spinophilin (Smith et al., 1999), filamin A (Li et al., 2000; Lin et al., 2001) and heart fatty-acid-binding protein (Takeuchi and Fukunaga, 2003), have also been identified. In addition, the

dimerization of D<sub>2</sub> receptors through interaction has also been shown (Lee et al., 2003). Thus, these evidences point to the ability of dopamine D<sub>2</sub> receptor to participate in protein-protein interaction with various cellular proteins and not only with sG<sub>i2</sub> protein, as reported here.

In the central nervous system, cell surface dopamine D<sub>2</sub> receptors are the major target of all effective antipsychotic drugs. Their interaction is considered to be the key event associated with improvements in patients (Kapur and Remington, 2001; Seeman and Kapur, 2000) and also in the generation of extrapyramidal side effects (Strange, 2001). Usually, antipsychotic drugs block dopamine D<sub>2</sub> receptor signalling; therefore, intracellular sequestration of D<sub>2</sub> receptor may offer an alternative in reducing the D<sub>2</sub>-mediated signaling without blocking its function. The advantage of this approach is that intracellular sequestration of D<sub>2</sub> receptor might reduce inhibitory components of D<sub>2</sub> signaling, one of the main causes for side effects in patients using antipsychotics.

In conclusion, our results demonstrate that the sG<sub>i2</sub> protein and the dopamine D<sub>2</sub> receptor form intracellular complexes that serve as of D<sub>2</sub> receptor reservoir. Treatment with D<sub>2</sub>-specific drugs break down this protein complex and free D<sub>2</sub> receptor can translocate to cell surface. We postulate that, in contrast to a long-term strategy where protein synthesis is essential, this mechanism is a short-term cellular strategy to cope with the demand for D<sub>2</sub> receptor while the protein synthesis machinery is unable to respond.

## Materials and Methods

### cDNA

cDNA clone of G $\alpha_{i2}$  (GenBank accession number, M17528) and G $\alpha_{i3}$  (GenBank accession number M20713) was provided by Randall R. Reed (Johns Hopkins University, Baltimore, MD). Human D<sub>1</sub>, D<sub>2S</sub> and D<sub>2L</sub> cDNA clones were from Olivier Civelli (University of California, Irvine, CA). The full-length cDNA of sG<sub>i2</sub> was obtained from human brain poly A<sup>+</sup> RNA (Clontech) and was submitted to GenBank at the accession number AY677118.

### Cloning

Genes were amplified by PCR using primers containing *MluI* and *Apal* or *MluI* and *XbaI* restriction sites at their 5' and 3' ends, respectively. For the deletion constructs, PCR primers were designed to amplify the sG<sub>i2</sub> DNA sequences containing restriction sites like those described above. The digestions were performed by incubating 3  $\mu$ g of DNA with 40 units of *MluI* and *Apal* or *MluI* and *XbaI* at 37°C for 4 hours. Digested DNA was separated on 1.4% agarose gels and recovered with Gel Extraction Kit (Qiagen). Digestion of pSinRep5 plasmid vector (Sindbis Expression System from Invitrogen) was also performed as above and was used for ligation. Gene DNA (0.5  $\mu$ g) was added to 0.5  $\mu$ g of digested plasmid DNA, ligated in the presence of 2 Weiss units of bacteriophage T4 DNA ligase and incubated for 1 hour at room temperature. The ligation mixture was directly transformed into a competent TOP10 One Shot cells (Invitrogen). Colonies were selected on LB agar plates containing 100  $\mu$ g/ml ampicillin. After isolation of plasmid DNA with Wizard Plus Minipreps DNA Purification System (Promega) from several colonies, they were analyzed for the presence of gene by restriction digestion with *MluI* and *Apal* and then by PCR using a combination of primers from both plasmid and gene. Usually, two to three colonies that showed correct size gene insert were then processed for large-quantity DNA isolation using Wizard Maxi-Plasmid Preparation System (Promega). The isolated DNA was quantified, aliquoted and stored at -20°C. These recombinant samples, including deletion constructs, were sequenced to confirm the DNA sequence.

### In vitro transcription, transfection and preparation of pseudovirions

The above described recombinant genes were used as template to produce recombinant RNA with the InvitroScript Cap SP6 in vitro Transcription Kit (Invitrogen). Briefly, 5  $\mu$ g of recombinant DNA was linearized with 50 units of *NotI*. The digest was extracted once with phenol-chloroform and 0.1 volumes of 5 M ammonium acetate and 2 volumes of ethanol were added and the mix was incubated at -20°C for 1 hour. After centrifugation, DNA pellet was suspended in RNase-free water to 0.5  $\mu$ g/ $\mu$ l. The in vitro transcription reaction was set up at room temperature by mixing 1  $\mu$ g of the linearized recombinant DNA with the SP6

transcription reagents as indicated by the Invitrogen protocol. The reaction was mixed gently and incubated for 2 hours at 37°C. A typical reaction yielded 10-20  $\mu$ g of RNA. The RNA product was purified with phenol-chloroform extraction, quantified with spectrophotometer, aliquoted into 10  $\mu$ l samples and stored at -80°C.

2  $\times$  10<sup>5</sup> baby hamster kidney (BHK) cells were seeded into six-well culture plates in 2 ml of growth medium and incubated at 37°C in 5% CO<sub>2</sub> for 12-18 hours until 80% confluency. Cells of each well were then washed with 2 ml OPTI-MEM I reduced-serum medium at room temperature. For liposome-mediated transfection, DMRIE-C reagent from Gibco was used. RNA-lipid complexes were prepared by adding 9  $\mu$ l of liposome reagent (DMRIE-C), 9  $\mu$ g of recombinant RNA and 9  $\mu$ g of helper RNA to 1 ml of OPTI-MEM I in polystyrene tubes and were mixed briefly by vortexing. The lipid-RNA complexes were immediately added to the washed BHK cells and incubated for 4 hours at 37°C. Following the incubation, transfection medium was replaced with complete growth medium containing  $\alpha$ MEM medium supplemented with 2 mM L-glutamine and 5% fetal bovine serum and the cells were incubated for an additional 36 hours. During this period, recombinant RNA are packaged into pseudovirion particles and then released into the medium. The medium from the cells was collected, aliquoted into 1 ml samples and stored at -80°C.

### Infection of cells with recombinant pseudovirions

Cell lines used in this study were obtained from the American Type Culture Collection and they were cultured at 37°C in a 5% CO<sub>2</sub> atmosphere. BHK cells were grown in  $\alpha$ MEM medium supplemented with 2 mM L-glutamine and 5% fetal bovine serum. JEG-3 human carcinoma cells were cultured in Eagle's MEM with 2 mM L-glutamine and Earle's BSS containing 1.5 g/l sodium bicarbonate, 0.1 mM non-essential amino acids, 1.0 mM sodium pyruvate, and 10% fetal bovine serum. NG108-15 neuroblastoma/glioma cells were grown in DMEM with 4 mM L-glutamine without sodium pyruvate and modified to contain 4.5 g/l glucose, 1.5 g/l sodium bicarbonate, 0.005 mM pyridoxin-HCl, HAT supplement, and 10% fetal bovine serum. Cells for infection were grown to approximately 70-80% confluency in 60-mm tissue culture plates, and pseudovirions (0-30  $\mu$ l) diluted to 450  $\mu$ l was added to each well. After incubation at room temperature for 1 hour, 4 ml of medium were added and cells were incubated for 30-34 hours for expression of functional protein. The optimal amount of pseudovirions needed for maximal protein expression was determined by making serial dilutions of the stock.

### Whole-cell binding assays

After infection with recombinant pseudovirions and protein expression, intact cells were harvested, counted and processed for the binding assays. As described previously (Khan et al., 1998b; Khan et al., 2001), the binding of [<sup>3</sup>H]sulpiride (NEN-PerkinElmer) to 10<sup>5</sup> cells was done by incubation with 0-1 nM of the radioligand for 1 hour at 24°C in a total volume of 0.5 ml. The reaction was terminated by rapid filtration through glass filters and counted for the retained radioactivity. This value was considered as total binding. Non-specific binding was determined with 1  $\mu$ M of (+)-butaclamol-HCl or fluphenazine (RBI-Sigma). Specific binding was calculated by subtracting non-specific binding from total binding. B<sub>max</sub> and K<sub>d</sub> values were calculated with Prism program (GraphPad Software). Data are presented as the mean  $\pm$  s.d. from six to eight independent experiments.

To control the amount of receptor expression, cells were homogenized in parallel experiments and used for receptor binding, similar as described for whole-cells receptor binding, to determine the total number of receptors in each condition. Variations in the total number of receptor within the same experiment and also between experiments were below 3%. Furthermore, the amount of pseudovirions and number of cells used in experiments were kept constant throughout the study.

### Antibodies

A peptide corresponding to sG<sub>i2</sub> protein residues 343-354, LSGPDQHPHPSP (GenBank accession number AY677118), was synthesized and coupled to keyhole limpet hemocyanin (KLH). Peptide conjugation and rabbit immunizations were performed as described previously (Khan and Gutierrez, 2004; Khan et al., 1998a; Khan et al., 1998b). Development of immune response was monitored by ELISA using immobilized synthetic peptides. Antibodies against sG<sub>i2</sub> were affinity-purified on the corresponding immobilized peptide as described in detail elsewhere (Khan et al., 1993). Briefly, peptide (5 mg) was coupled to 1 g of activated thiopropyl-Sepharose 6B (Pharmacia LKB). One milliliter of antiserum diluted fivefold in 10 mM phosphate-buffered saline (PBS) (10 mM Na<sub>2</sub>PO<sub>4</sub>, 0.14 M NaCl, 0.01 M KCl, pH 7.4) was circulated through the peptide column. After washing, the antibody was eluted with 50 mM glycine-HCl pH 2.3, and collected in 1-ml fractions. OD<sub>280</sub> was determined for each fraction and fractions containing antibodies were pooled and dialyzed in PBS. Antibodies were stored as 50- $\mu$ l aliquots at -20°C. Specificity of affinity-purified antibody was then determined (Khan and Gutierrez, 2004) (supplementary material Fig. S1). The isoform-specific D<sub>2S</sub> and D<sub>2L</sub> antibodies had been prepared earlier by us and their specificity have already been demonstrated (Khan et al., 1998a; Khan et al., 2001).

## Immunoblots

Immunoblots were done as described previously (Khan et al., 1998a; Khan et al., 1993). Solubilization of proteins from harvested intact cells was done with solubilization buffer provided in Seize X Mammalian Immunoprecipitation kit (Pierce). These solubilized proteins were separated by 10% SDS-PAGE and transblotted to nitrocellulose membranes. Membranes containing proteins were incubated with 5 µg/ml antibodies to sGi<sub>2</sub>, D<sub>2S</sub> or D<sub>2L</sub>, followed by incubation with anti-rabbit IgG-HRP (1:2000; Amersham). Bands were visualized using an ECL kit (Amersham).

## Calculation of percentile in immunoblots

The concentration of bands in blot experiment (Fig. 7B) was obtained by OD measurements (Fig. 7C). These results suggest that approximately 75% of D<sub>2</sub> receptor was uncoupled from the D<sub>2</sub>-sGi<sub>2</sub> complex after drug treatment. This calculation is based on the assumption that D<sub>2</sub> receptor population bound to sGi<sub>2</sub>-D<sub>2</sub> complex is 100% (Fig. 7B, C5) under normal conditions when D<sub>2</sub> receptor and sGi<sub>2</sub> are co-expressed. However, when comparing data of blots with binding experiments, this 100% of D<sub>2</sub> receptor population of the D<sub>2</sub>-sGi<sub>2</sub> complex represent approximately 30% in binding experiments (see Fig. 1). Therefore, normalizing the results of both blots and binding experiments to the same level (30%), the 75% value of blots comes down to 22%. A slightly lower value in the binding experiments might reflect the population of unbound receptor still in transit.

## Fluorescence immunocytochemistry

After infection with recombinant pseudovirions and after protein expression, cells grown on Flask-style glass slides (Nunc) were fixed with 4% paraformaldehyde and 0.2% glutaraldehyde for 10 minutes and permeabilized with 0.3% Triton X-100. Immunofluorescence staining of cells was performed as described earlier (Khan et al., 1998a; Khan et al., 1998b; Khan et al., 2001; Khan and Gutierrez, 2004; Lopez-Aranda et al., 2006). Briefly, after incubation with sGi<sub>2</sub> antibody (1:500), cells were incubated with FITC (green) coupled to anti-rabbit Fab2 fragment (1:100; Jackson), followed by incubation with D<sub>2S</sub> antibody (1:200) and Cy3-conjugated secondary antibody (red) (1:200; Jackson). Images were taken with Zeiss confocal microscope.

## Ca<sup>2+</sup> imaging

Cells infected with recombinant pseudovirions were grown on glass coverslips and incubated with 2 µM fluo-4-AM (fluo-4 acetoxymethyl ester from Molecular Probes) for 15-30 minutes. The fluorescence change in cells after application of 15 µM raclopride was measured with a Zeiss LSM 410 confocal laser scanning microscope system as described previously (Koulen et al., 1999). Images were acquired every 500 mseconds. Changes in fluorescence intensity were calculated by dividing the fluorescence intensity during drug application (F) by the average baseline fluorescence intensity (F<sub>0</sub>). Non-stimulus-related spontaneous changes in fluorescence were 1-3%. Data are presented as the mean ± s.d. of four independent experiments.

## Immunoaffinity elution

Protein solubilization, antibody immobilized affinity column preparation and protein elution was performed as described in Seize X Mammalian Immunoprecipitation Kit (Pierce). In brief, 0.8 ml of gel-immobilized protein G was washed with PBS buffer (10 mM Na<sub>2</sub>PO<sub>4</sub>, 0.14 M NaCl, 0.01 M KCl, pH 7.4) by centrifugation and incubated with 2 mg of affinity-purified antibodies for 1 hour. The mixture was then transferred to spin cups and centrifuged. Flow-through was collected to determine the amount of antibody bound to resin. Approximately 80-90% of antibodies were bound; 1.3 mg of DSS crosslinker in DMSO was added to the resin and gently mixed by inversion for 1 hour. Resin was washed with Tris buffer (25 mM Tris, 0.15 M NaCl, pH 7.2) in spin cups and stored in 1 ml of PBS buffer containing 0.01% sodium azide.

After infection with recombinant pseudovirions, whole cells (2 × 10<sup>6</sup>) were harvested and lysed with 2 ml of M-PER Mammalian Protein Extraction reagent (Pierce) for 10 minutes. After removing cell debris by centrifugation, clear supernatant was diluted 1:1 with PBS buffer and added to spin columns with resin bound to antibody. The samples were incubated for 2 hour at 4°C and eluted with 400 µl of elution buffer (pH 2.8). Immunoaffinity eluted proteins were then analyzed by immunoblots.

For the brain tissues, membrane was prepared as described earlier (Khan et al., 1998a; Khan et al., 1998b; Khan et al., 2001; Khan et al., 1993). The prepared membrane was then used for the protein solubilization, binding with affinity-column and elution as explained above.

## Co-immunoprecipitation

Cells were infected with recombinant pseudovirions, harvested and their proteins were solubilized with 1% digitonin (Khan et al., 1998a; Khan et al., 1998b). After centrifugation, the supernatant was used for incubation with 20 µl of affinity-purified sGi<sub>2</sub> antibody. The protein-antibody complexes were separated by incubation with 80 µl of proteinA-agarose (Sigma) followed by centrifugation. The non-immunoprecipitated supernatant was used for the binding assay using D<sub>2</sub>-specific ([<sup>3</sup>H]raclopride) and D<sub>1</sub>-specific ([<sup>3</sup>H]SCH 23390) radioligands as

described elsewhere (Khan et al., 1993; Khan et al., 1998a; Khan et al., 1998b; Khan et al., 2001). For the binding assay, supernatant was incubated with 1 nM radioligand in total of 0.5 ml. Reaction was terminated by rapid filtration and retained radioactivity was counted as described above in detail in whole-cell binding assays. The amount of co-immunoprecipitated receptors was calculated by subtracting the binding values of supernatant from the total (100%) binding of radioligands. Incubation without addition of antiserum represented 100% binding.

## Calculation of immunoprecipitation values

For calculation and deduction of immunoprecipitation values as in Fig. 4, proteins extract of cells was incubated with pre-immune serum or antiserum against sGi<sub>2</sub> protein after termination of the experiment. The immunocomplex (sGi<sub>2</sub>-D<sub>2</sub> complex) was precipitated using proteinA-agarose. The supernatant portion of this reaction was used for binding assays and cpm values were obtained after counting in scintillation counter. A value of 100% was assigned to the cpm values obtained from the extract treated with preimmune serum. The immunoprecipitation values were calculated by subtracting the values of supernatant originated from extract treated with antiserum to the 100% value, meaning amount of supernatant derived from extract treated with preimmune serum minus amount of supernatant derived from extract treated with antiserum equal the amount of immunoprecipitated receptor.

## Drugs treatment

Following infection and protein expression, harvested intact cells were incubated with agonists (10 µM dopamine and 5 µM quinpirole, both from Sigma/RBI) and antagonist (5 µM raclopride from Sigma/RBI) for 30 minutes. After washing, cells were processed for whole-cell binding assays and immunoblots as described above.

We thank O. Civelli for cDNA of dopamine receptors; R. Reed for cDNA of G-proteins. This work was supported by BFI2003-03464, BFU2006-0306 and Ramón y Cajal program grants from MEC (to Z.U.K.), FIS PI060556 grant from MSC (to A.G.) and a Young Investigator Award from NARSAD (to P.K.).

## References

- Audigier, Y., Nigam, S. K. and Blobel, G. (1988). Identification of a G protein in rough endoplasmic reticulum of canine pancreas. *J. Biol. Chem.* **263**, 16352-16357.
- Bomsel, M. and Mostov, K. (1992). Role of heterotrimeric G proteins in membrane traffic. *Mol. Biol. Cell* **3**, 1317-1328.
- Bouday, V. A., Luedtke, R. R. and Molinoff, P. B. (1993). Development of polyclonal anti-D<sub>2</sub> dopamine receptor antibodies to fusion proteins: inhibition of D<sub>2</sub> receptor-G protein interaction. *J. Neurochem.* **60**, 2181-2191.
- Bouday, V. A., Pacheco, M. A., Guan, W. and Molinoff, P. B. (1995). Agonists and antagonists differentially regulate the high affinity state of the D<sub>2L</sub> receptor in human embryonic kidney 293 cells. *Mol. Pharmacol.* **48**, 956-964.
- Chronwall, B. M., Beatty, D. M., Sharma, P. and Morris, S. J. (1995). Dopamine D<sub>2</sub> receptor regulate in vitro melanotroph L-type Ca<sup>2+</sup> channel activity. *Endocrinology* **136**, 614-621.
- Creese, I. and Sibley, D. R. (1981). Receptor adaptations to centrally acting drugs. *Annu. Rev. Pharmacol. Toxicol.* **21**, 357-391.
- Creese, I., Burt, D. R. and Snyder, S. H. (1976). Dopamine receptor binding predicts clinical and pharmacological potencies of antischizophrenic drugs. *Science* **192**, 481-483.
- Damaj, B. B., McColl, S. R., Mahana, W., Crouch, M. F. and Naccache, P. H. (1996). Physical association of Gi<sub>2</sub>alpha with interleukin-8 receptors. *J. Biol. Chem.* **271**, 12783-12789.
- Ercolani, L., Stow, J. L., Boyle, J. F., Holtzman, E. J., Lin, H., Grove, J. R. and Ausiello, D. A. (1990). Membrane localization of the pertussis toxin-sensitive G-protein subunits alpha i-2 and alpha i-3 and expression of a metallothionein-alpha i-2 fusion gene in LLC-PK1 cells. *Proc. Natl. Acad. Sci. USA* **87**, 4635-4639.
- Filtz, T. M., Artymyshyn, R. P., Guan, W. and Molinoff, P. B. (1993). Paradoxical regulation of dopamine receptors in transfected 293 cells. *Mol. Pharmacol.* **44**, 371-379.
- Gazi, L., Nickolls, S. A. and Strange, P. G. (2003). Functional coupling of the human dopamine D<sub>2</sub> receptor with G alpha i1, G alpha i2, G alpha i3 and G alpha o G proteins: evidence for agonist regulation of G protein selectivity. *Br. J. Pharmacol.* **138**, 775-786.
- Goss, J. R., Kelly, A. B., Johnson, S. A. and Morgan, D. G. (1991). Haloperidol treatment increases D<sub>2</sub> dopamine receptor protein independently of RNA levels in mice. *Life Sci.* **48**, 1015-1022.
- Guiramand, J., Montmayeur, J. P., Ceraline, J., Bhatia, M. and Borrelli, E. (1995). Alternative splicing of the dopamine D<sub>2</sub> receptor directs specificity of coupling to G-proteins. *J. Biol. Chem.* **270**, 7354-7358.
- Helms, J. B. (1995). Role of heterotrimeric GTP binding proteins in vesicular protein transport: indications for both classical and alternative G protein cycles. *FEBS Lett.* **369**, 84-88.
- Itokawa, M., Toru, M., Ito, K., Tsuga, H., Kameyama, K., Haga, T., Arinami, T. and Hamaguchi, H. (1996). Sequestration of the short and long isoforms of dopamine D<sub>2</sub> receptors expressed in Chinese hamster ovary cells. *Mol. Pharmacol.* **49**, 560-566.



- Ivins, K. J., Luedtke, R. R., Artyomshyn, R. P. and Molinoff, P. B. (1991). Regulation of dopamine D2 receptors in a novel cell line (SUP1). *Mol. Pharmacol.* **39**, 531-539.
- Kapur, S. and Remington, G. (2001). Dopamine D2 receptors and their role in atypical antipsychotic action: still necessary and may even be sufficient. *Biol. Psychiatry* **50**, 873-883.
- Khan, Z. U. and Gutierrez, A. (2004). Distribution of C-terminal splice variant of G alpha i2 in rat and monkey brain. *Neuroscience* **127**, 833-843.
- Khan, Z. U., Fernando, L. P., Escriba, P., Busquets, X., Mallet, J., Miralles, C. P., Filla, M. and De Blas, A. L. (1993). Antibodies to the human  $\gamma_2$  subunit of the  $\gamma$ -aminobutyric acid/benzodiazepine receptor. *J. Neurochem.* **60**, 961-971.
- Khan, Z. U., Mrzljak, L., Gutierrez, A., de la Calle, A. and Goldman-Rakic, P. S. (1998a). Prominence of the dopamine D2 short isoform in dopaminergic pathways. *Proc. Natl. Acad. Sci. USA* **95**, 7731-7736.
- Khan, Z. U., Gutierrez, A., Martin, R., Penafiel, A., Rivera, A. and De La Calle, A. (1998b). Differential regional and cellular distribution of dopamine D2-like receptors. An immunocytochemical study of subtype-specific antibodies in rat and human brain. *J. Comp. Neurol.* **402**, 353-371.
- Khan, Z. U., Koulou, P., Rubinstein, M., Grandy, D. K. and Goldman-Rakic, P. S. (2001). An astroglia-linked dopamine D2-receptor action in prefrontal cortex. *Proc. Natl. Acad. Sci. USA* **98**, 1964-1969.
- Koulou, P., Kuhn, R., Wassele, H. and Brandstatter, J. H. (1999). Modulation of the intracellular calcium concentration in photoreceptor terminals by a presynaptic metabotropic glutamate receptor. *Proc. Natl. Acad. Sci. USA* **96**, 9909-9914.
- Lee, S. P., O'Dowd, B. F., Rajaram, R. D., Nguyen, T. and George, S. R. (2003). D2 dopamine receptor homodimerization is mediated by multiple sites of interaction, including an intermolecular interaction involving transmembrane domain 4. *Biochemistry* **42**, 11023-11031.
- Li, M., Bermak, J. C., Wang, Z. W. and Zhou, Q. Y. (2000). Modulation of dopamine D(2) receptor signaling by actin-binding protein (ABP-280). *Mol. Pharmacol.* **57**, 446-452.
- Lin, R., Karpa, K., Kabbani, N., Goldman-Rakic, P. S. and Levenson, R. (2001). Dopamine D2 and D3 receptors are linked to the actin cytoskeleton via interaction with filamin A. *Proc. Natl. Acad. Sci. USA* **98**, 5258-5263.
- Lledo, P. M., Legendre, P., Israel, J. M. and Vincent, J. D. (1990). Dopamine inhibits two characterized voltage-dependent calcium currents in identified rat lactotroph cells. *Endocrinology* **127**, 990-1001.
- Lopez-Aranda, M. F., Acevedo, M. J., Carballo, F. J., Gutierrez, A. and Khan, Z. U. (2006). Localization of GoLoco motif carrier regulator of G-protein signalling 12 and 14 proteins in monkey and rat brain. *Eur. J. Neurosci.* **23**, 2971-2982.
- Malek, D., Munch, G. and Palm, D. (1993). Two sites in the third inner loop of the dopamine D2 receptor are involved in functional G protein-mediated coupling to adenylate cyclase. *FEBS Lett.* **325**, 215-219.
- Montmayeur, J. P. and Borrelli, E. (1994). Targeting of G alpha i2 to the Golgi by alternative spliced carboxyl-terminal region. *Science* **263**, 95-98.
- Ng, G. Y., Varghese, G., Chung, H. T., Trogadis, J., Seeman, P., O'Dowd, B. F. and George, S. R. (1997). Resistance of the dopamine D2L receptor to desensitization accompanies the up-regulation of receptors on to the surface of Sf9 cells. *Endocrinology* **138**, 4199-4206.
- Pauwels, P. J., Tardiff, S., Wurch, T. and Colpaert, F. C. (2001). Real-time analysis of dopamine: antagonist interaction at recombinant human D2 long receptor upon modulation of its activation state. *Br. J. Pharmacol.* **134**, 66-97.
- Picetti, R. and Borrelli, E. (2000). A region containing a proline-rich motif targets sG(i2) to the golgi apparatus. *Exp. Cell Res.* **255**, 258-269.
- Pilon, C., Levesque, D., Dimitriadou, V., Griffon, N., Martres, M. P., Schwartz, J. C. and Sokoloff, P. (1994). Functional coupling of the human dopamine D2 receptor in a transfected NG 108-15 neuroblastoma-glioma hybrid cell line. *Eur. J. Pharmacol.* **268**, 129-139.
- Pimplikar, S. W. and Simons, K. (1993). Regulation of apical transport in epithelial cells by a Gs class of heterotrimeric G protein. *Nature* **362**, 456-458.
- Seeman, P. and Kapur, S. (2000). Schizophrenia: more dopamine, more D2 receptors. *Proc. Natl. Acad. Sci. USA* **97**, 7673-7675.
- Senogles, S. E. (1994). D2 dopamine receptor isoforms signal through distinct Gi alpha proteins to inhibit adenylate cyclase. A study with site-directed mutant Gi alpha proteins. *J. Biol. Chem.* **269**, 23120-23127.
- Senogles, S. E., Heimert, T. L., Odife, E. R. and Quasney, M. W. (2004). A region of the third intracellular loop of the short form of the D2 dopamine receptor dictates Gi coupling specificity. *J. Biol. Chem.* **279**, 1601-1606.
- Severson, J. A., Robinson, H. E. and Simpson, G. M. (1984). Neuroleptic-induced striatal dopamine receptor supersensitivity in mice: relationship to dose and drug. *Psychopharmacology Berl.* **84**, 115-119.
- Smith, F. D., Oxford, G. S. and Milgram, S. L. (1999). Association of the D2 dopamine receptor third cytoplasmic loop with spinophilin, a protein phosphatase-1-interacting protein. *J. Biol. Chem.* **274**, 19894-19900.
- Starr, S., Kozell, L. B. and Neve, K. A. (1995). Drug-induced up-regulation of dopamine D2 receptors on cultured cells. *J. Neurochem.* **65**, 569-577.
- Strange, P. G. (2001). Antipsychotic drugs: importance of dopamine receptors for mechanisms of therapeutic actions and side effects. *Pharmacol. Rev.* **53**, 119-133.
- Takeuchi, Y. and Fukunaga, K. (2003). Differential subcellular localization of two dopamine D2 receptor isoforms in transfected NG108-15 cells. *J. Neurochem.* **85**, 1064-1074.
- Wedegaertner, P. B. (2002). Characterization of subcellular localization and stability of a splice variant of G alpha i2. *BMC Cell. Biol.* **3**, 12.
- Weiss, T. S., Chamberlain, C. E., Takeda, T., Lin, P., Hahn, K. M. and Farquhar, M. G. (2001). G $\alpha$ i3 binding to calnexin on Golgi membranes in living cells monitored by fluorescence resonance energy transfer of green fluorescent protein fusion proteins. *Proc. Natl. Acad. Sci. USA* **98**, 14961-14966.
- Wolfe, S. E. and Morris, S. J. (1999). Dopamine D2 receptor isoforms expressed in AT20 cells differentially couple to G proteins to acutely inhibit high voltage-activated calcium channels. *J. Neurochem.* **73**, 2375-2382.
- Zhang, L. J., Lachowicz, J. E. and Sibley, D. R. (1994). The D2S and D2L dopamine receptor isoforms are differentially regulated in Chinese hamster ovary cells. *Mol. Pharmacol.* **45**, 878-889.
